# Supplementary material
Source: PubMed Central journal article supplement (PMC3678986)
Supplement: NIHMS477316-supplement-2.pdf [file NIHMS477316-supplement-2.pdf]

## **Deletion of the last five C-terminal amino acid residues of Connexin43 leads to lethal ventricular arrhythmias in mice without affecting coupling of gap junction channels**

First author: Lübke-meier

Short title: Lethal cardiac arrhythmias in Cx43D378stop mice

Indra Lübke-meier<sup>1</sup>, diploma biologist; Robert Pascal Requardt<sup>2</sup>, PhD; Xianming Lin<sup>3</sup>, PhD; Philipp Sasse<sup>4</sup>, MD; René Andrié<sup>5</sup>, MD; Jan Wilko Schrickel<sup>5</sup>, MD; Halina Chkourko<sup>3</sup>, PhD; Feliksas F Bukauskas<sup>6</sup>, PhD; Jung-Sun Kim<sup>7</sup>, MD, PhD; Marina Frank<sup>1</sup>, diploma biologist; Daniela Malan<sup>4</sup>, PhD; Jiong Zhang<sup>8</sup>, diploma biologist; Angela Wirth<sup>9</sup>, PhD; Radoslaw Dobrowolski<sup>10</sup>, Peter J Mohler<sup>11</sup>, PhD; Stefan Offermanns<sup>9</sup>, MD; Bernd K Fleischmann<sup>4</sup>, MD; Mario Delmar<sup>3</sup>, MD, PhD and Klaus Willecke<sup>1§</sup>, PhD.

<sup>1</sup> Life and Medical Sciences (LIMES) Institute, Molecular Genetics, University of Bonn, Bonn, Germany

<sup>2</sup> Jena University Hospital, Center for Sepsis Control and Care (CSCC), Jena, Germany

<sup>3</sup> Leon H. Charney Division of Cardiology, New York University Medical School, New York, NY, USA

<sup>4</sup> Institute of Physiology I, Life and Brain Center, University of Bonn, Bonn, Germany

<sup>5</sup> Institute of Medicine Cardiology, University of Bonn, Bonn, Germany

<sup>6</sup> Dominick P. Purpura Department of Neuroscience of Albert Einstein College of Medicine, NY, USA

<sup>7</sup> Department of Pathology, Samsung Medical Center, Sungkyunkwan University School of Medicine, Seoul, Korea

<sup>8</sup> Institute of Cellular Neurosciences, University of Bonn, Bonn, Germany

<sup>9</sup> Max Planck Institute for Heart and Lung Research, Bad Nauheim, Germany

<sup>10</sup> Department of Biological Sciences, Rutgers University, Newark, NJ, USA

<sup>11</sup> Departments of Internal Medicine and Physiology, Dorothy M. Davis Heart and Lung Research Institute, Ohio State University Medical Center, Columbus, OH, USA

\* The senior authors contributed equally to this work.

§ Corresponding author

Dr. Klaus Willecke  
LIMES-Institute  
Molecular Genetics  
University of Bonn  
Carl-Troll-Str. 31  
53115 Bonn, Germany  
Phone: +49 228 7362743  
Fax: +49 228 7362642  
Email: k.willecke@uni-bonn.de

## Online Resource 2:

**Suppl. Fig. 1** Generation of conditional Cx43D378stop mice. **a** Homologous recombination of the conditional Cx43D378stop-vector with the genomic locus of the Cx43 gene leads to the recombined allele mCx43floxD378stop. Besides the 5' and 3' homologous regions the vector consists of a loxP (locus of crossing over P1) site flanked region containing the Cx43WT sequence, its 3' untranslated region and an inverted neomycin resistance cDNA driven by a PGK (phosphoglycerate kinase) promoter and flanked by frt (Flp recognition target) sites. Furthermore, the vector contains the mutated Cx43D378stop sequence followed by an IRES-eGFP construct. Cre-mediated recombination leads to the deletion of the Cx43WT sequence, its 3' untranslated region, neomycin resistance gene and results in the genotype mCx43D378stop. **b** Southern blot analysis with an internal probe on *Bgl*II digested heart DNA from different genotypes verified homologous recombination in Cx43floxD378stop mice. Detection of a 7.5 kb fragment indicates the Cx43 wild-type allele and a 3.9 kb as well as a 10.3 kb fragment the Cx43floxD378stop allele. **c** Northern blot analysis with an internal probe on total RNA from neonatal hearts of different genotypes verifies the transcriptional expression of the Cx43D378stop mutation after Cre-mediated recombination. Detection of a 3.1 kb fragment indicates the Cx43 wild-type mRNA and a 4.4 kb fragment the Cx43D378stop-IRES-eGFP bicistronic mRNA. **d** PCR genotyping of Cx43D378stop mice results in a 350 bp fragment for the Cx43 wildtype allele and a 400 bp fragment for the Cx43floxD378stop allele

**Suppl. Fig. 2.** Voltage gating of Cx43D378stop GJ channels. **a** Junctional current ( $I_j$ ) in response to a transjunctional voltage ( $V_j$ ) step of -95 mV, followed by repeated  $V_j$  ramps of small amplitude in a HeLaCx43D378stop cell pair. The insert shows that  $I_j$  does not decay substantially during ~0.5 s. This result supports the notion that the minor, short lasting differences in membrane potential between two neighboring myocytes during propagation cannot cause a substantial decay of junctional conductance ( $g_j$ ). **b** Normalized  $g_j$ - $V_j$  plot of Cx43D378stop channels (in black) averaged from four  $g_j$ - $V_j$  plots measured using  $V_j$  ramps changing over 30 s from 0 to 105 mV. The data demonstrate that Cx43D378stop gap junctions are in fact less dependent on  $V_j$  than the wild-type control (grey line; from [1]). These results exclude the possibility that the enhanced arrhythmogenicity observed in Cx43D378stop hearts results from an enhanced dynamic reduction in junctional conductance [2] associated with the  $V_j$  gating of the channel.

**Suppl. Fig. 3** Late sodium current densities recorded from adult cardiac myocytes isolated from Cx43D378stop mice. There is no change of late sodium current density in Cx43D378stop cells

**Suppl. Fig. 4** Sodium current properties recorded from adult cardiac myocytes isolated from wild-type mice injected with tamoxifen. **a,b,c:** Average peak sodium current density as a function of voltage command, Voltage dependence of  $I_{Na}$  steady-state inactivation curves and Time course of  $I_{Na}$  recovery from inactivation. n=6 for each group (pNS)

**Suppl. Fig. 5** Average  $I_{K1}$  current density as a function of voltage command. There is no difference of  $I_{K1}$  current densities at both -120 mV and -50 mV between Cx43D378stop and control cells. n=14 for control and 15 for Cx43D378stop

**Suppl. Fig. 6** Transcriptional expression of the  $\text{Na}_v1.5$  gene in adult Cx43D378stop hearts. Quantitative Real-Time-PCR analyses of  $\text{Na}_v1.5$  expression revealed no significant differences between control and Cx43D378stop hearts.  $n=4$  for both groups

**Suppl. Fig. 7** Triton X-100 fractionation assay with Cx43 and Cx43D378stop stable expressing HeLa cells. Immuno blot analyses reveal presence of Cx43D378stop protein in both Triton-insoluble and Triton-soluble fractions. Similar to the Cx43 wild-type protein, the Cx43D378stop protein can be found in junctional and non-junctional connexin channels.  $n=3$  for both groups

**Suppl. Fig. 8** Quantification of ZO-1 and Nav1.5 protein expression in neonatal and adult Cx43D378stop hearts. Statistical analyses revealed no significant differences in the expression levels of ZO-1 and Nav1.5 protein between neonatal (a) or adult (b) control and Cx43D378stop hearts.  $n=3$  for both groups

**Suppl. Fig. 9** Localization of N-Cadherin and cardiac actin in the mutated Cx43D378stop adult heart. Immunological staining of N-Cadherin (green), cardiac actin (red) and nuclei (blue) in sections of control (a) and Cx43D378stop (b) hearts verifies localization of N-Cadherin at intercalated discs between ventricular cardiomyocytes (merged magnifications). Staining of cardiac actin reveals no obvious differences in cytoskeleton organization between control and Cx43D378stop hearts.  $n=4$  for both groups. Bar: 20  $\mu\text{m}$

**Suppl. Fig. 10** Co-immunoprecipitation analysis (Co-IP) of Cx43D378stop, ZO-1 and  $\text{Na}_v1.5$  in adult hearts. **a** Immuno blots of pulled-down fractions performed on lysates from control and Cx43D378stop hearts revealed immuno precipitation of wildtype and mutated Cx43D378stop protein by ZO-1 or  $\text{Na}_v1.5$ . After Co-IP, membranes were probed with polyclonal Cx43 antibodies (upper panel) and re-probed with polyclonal ZO-1 or  $\text{Na}_v1.5$  antibodies (middle panel) to confirm immuno precipitation. As an input control, 80  $\mu\text{g}$  of flow-through lysate were probed with polyclonal Cx43 antibodies (lower panel).  $n=3$  for both groups. **b** As a negative control, polyclonal rabbit IgG antibodies were used to pull-down fractions of control (left panel) and Cx43D378stop (right panel) lysates. Immunoblots with polyclonal Cx43 antibodies revealed no unspecific pull-down of Cx43 or Cx43D378stop protein by the IgG antibody-coupled beads. As an input control, 80  $\mu\text{g}$  of flow-through lysate were used.

## References

1. Bukauskas FF, Bukauskiene A, Bennett MV, Verselis VK (2001) Gating properties of gap junction channels assembled from connexin43 and connexin43 fused with green fluorescent protein. *Biophys J* 81:137-152 doi:10.1016/S0006-3495(01)75687-1
2. Lin X, Gemel J, Beyer EC, Veenstra RD (2005) Dynamic model for ventricular junctional conductance during the cardiac action potential. *Am J Physiol Heart Circ Physiol* 288:H1113-1123 doi:10.1152/ajpheart.00882.2004

Suppl. Figs.

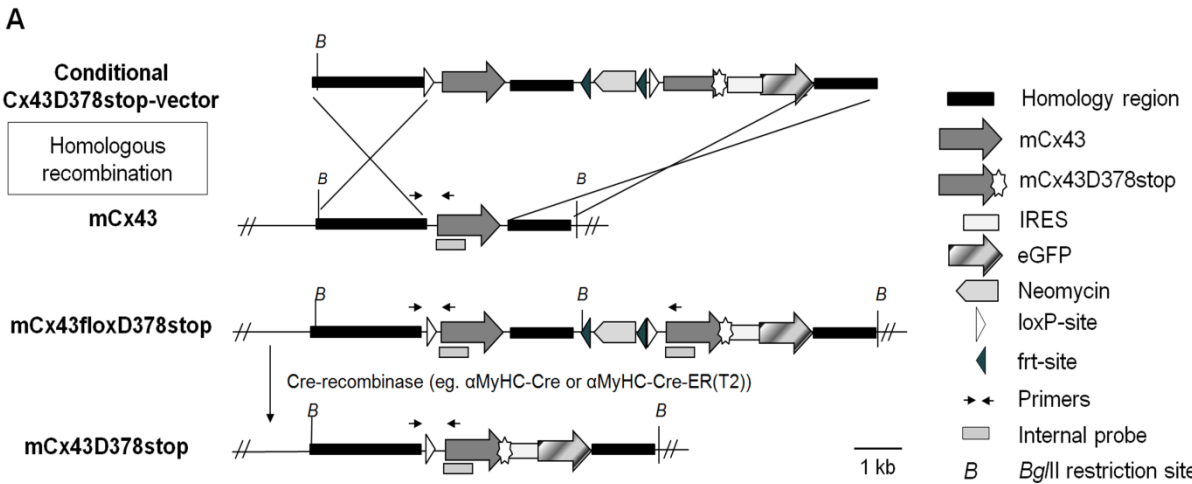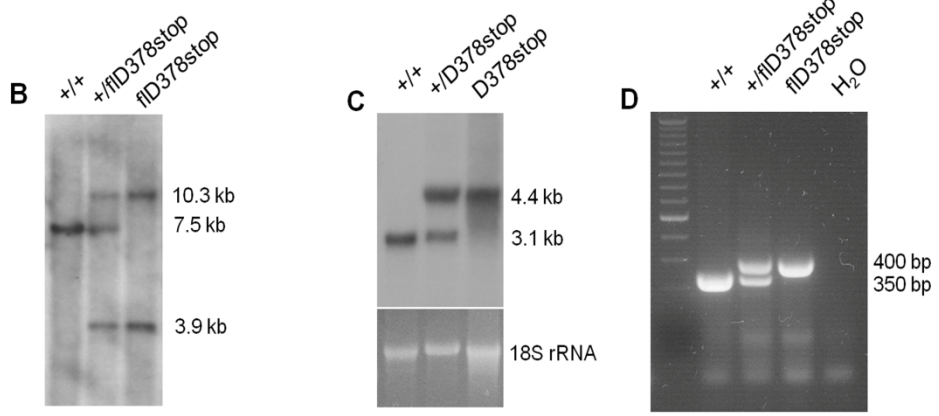

Suppl. Fig. 1

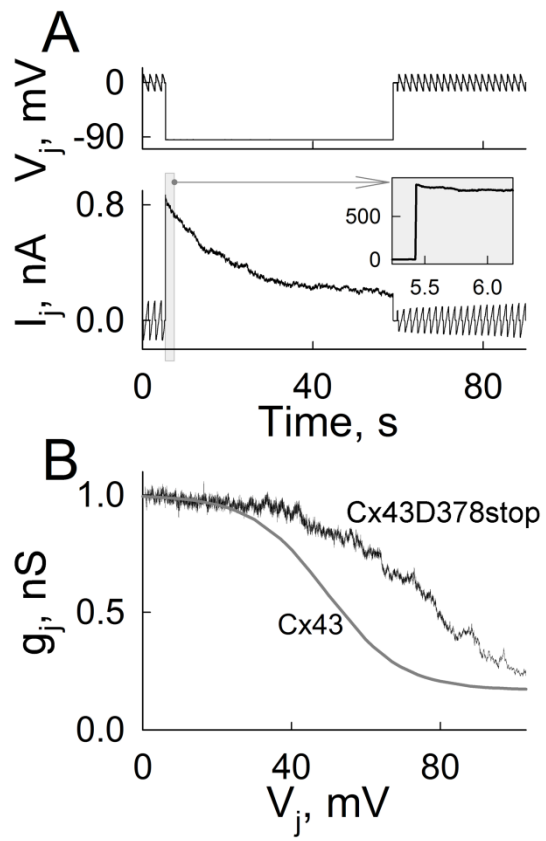

Suppl. Fig. 2

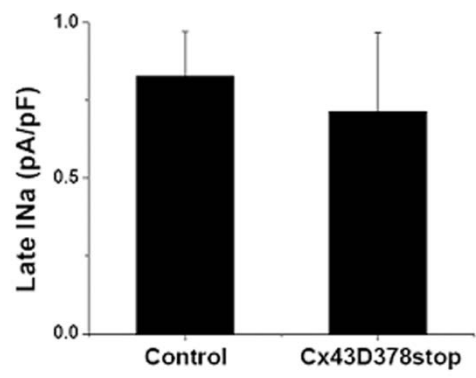

***Suppl. Fig. 3***

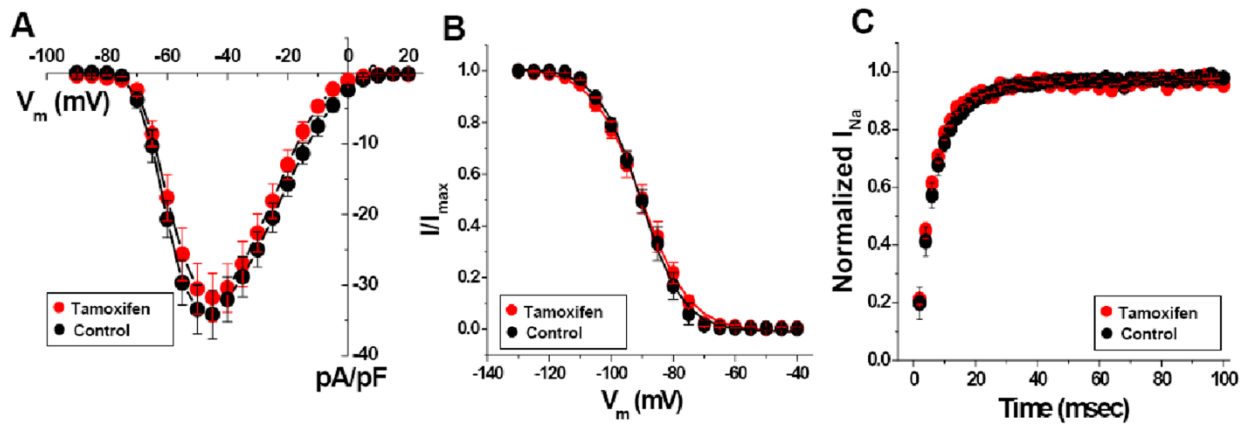

Suppl. Fig. 4



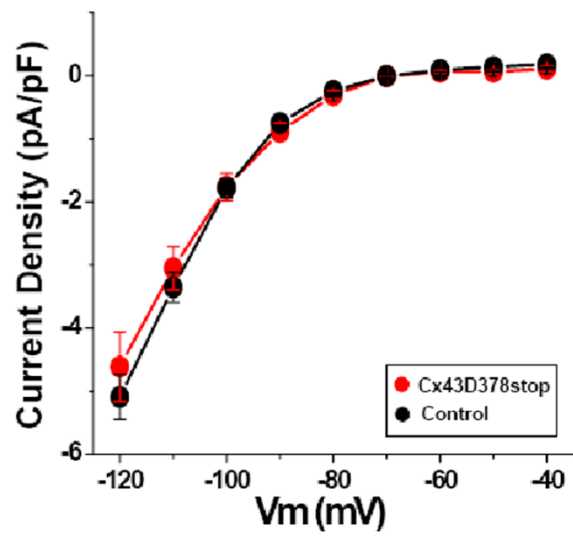

*Suppl. Fig. 5*

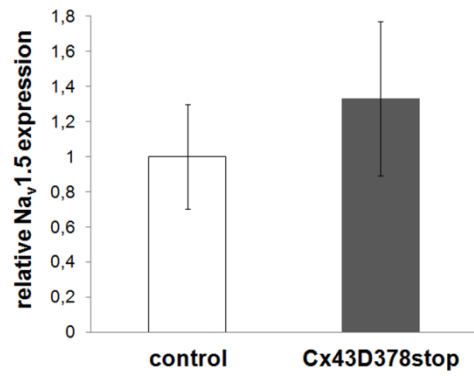

**Suppl. Fig. 6**

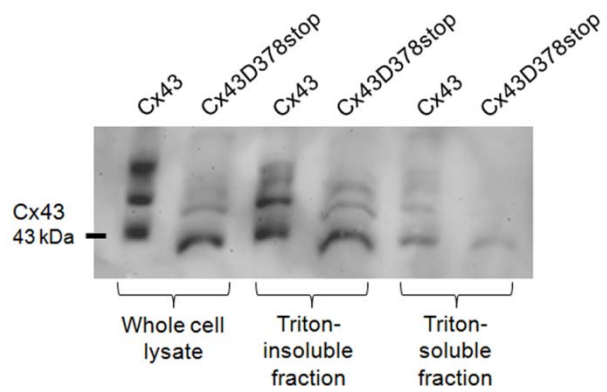

**Suppl. Fig. 7**

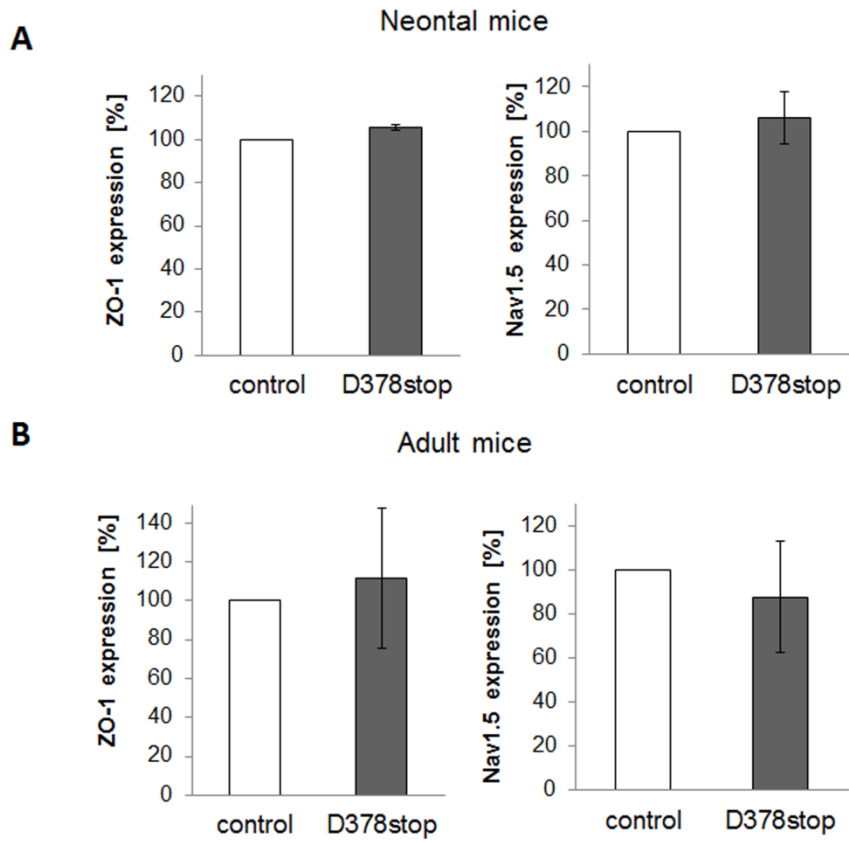

**Suppl. Fig. 8**

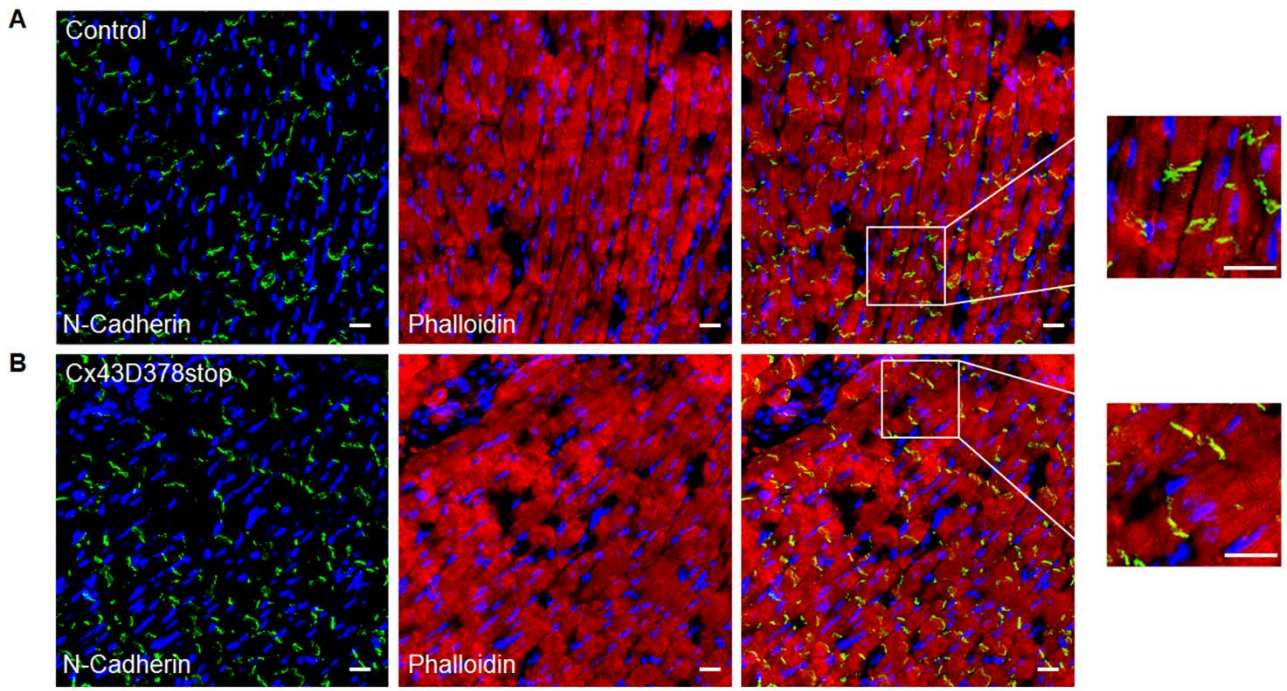

**Suppl. Fig. 9**

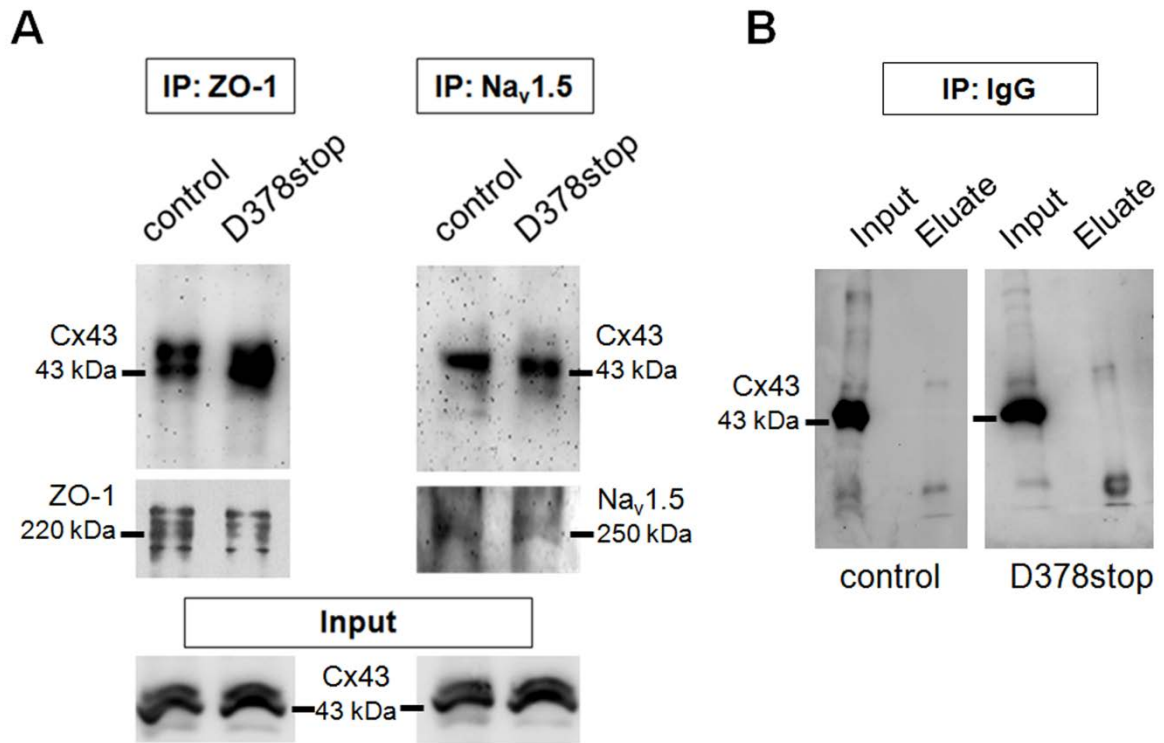

**Suppl. Fig. 10**

**Suppl. Table 1** Parameters of heart rate, PQ interval and QRS amplitude of ECG recordings from fetal Cx43D378stop mice

|                     | <b>Heart rate<br/>(bpm)</b> | <b>PQ interval<br/>(msec)</b> | <b>QRS amplitude<br/>(<math>\mu</math>V)</b> |
|---------------------|-----------------------------|-------------------------------|----------------------------------------------|
| <b>Control</b>      | 108 $\pm$ 13                | 94 $\pm$ 9                    | 119 $\pm$ 40                                 |
| <b>Cx43D378stop</b> | 117 $\pm$ 22                | 107 $\pm$ 12                  | 130 $\pm$ 75                                 |

**Suppl. Table 2** Parameters of heart rate and PQ interval of ECG recordings from adult Cx43D378stop mice

|                     | <b>Heart rate<br/>(bpm)</b> | <b>PQ interval<br/>(msec)</b> |
|---------------------|-----------------------------|-------------------------------|
| <b>Control</b>      | 573 ± 23                    | 40 ± 0.6                      |
| <b>Cx43D378stop</b> | 558 ± 33                    | 43 ± 4                        |



**Suppl. Table 3** Fitting parameters of  $K_v$  currents at 40 mV recorded from Cx43D378stop cells

|                     | $A_1$          | $t_1$        | $A_2$        | $t_2$         | $A_0$       |
|---------------------|----------------|--------------|--------------|---------------|-------------|
| <b>Control</b>      | $24 \pm 3.3$   | $57 \pm 3.0$ | $11 \pm 0.9$ | $1108 \pm 97$ | $6 \pm 0.5$ |
| <b>Cx43D378stop</b> | $16 \pm 1.2^*$ | $62 \pm 4.6$ | $11 \pm 1.6$ | $1049 \pm 56$ | $5 \pm 0.6$ |

\* $P < 0.05$ .

**Suppl. Table 4** Parameters of action potentials recorded from Cx43D378stop cells

|                     | <b>APD90<br/>(msec)</b> | <b>APD70<br/>(msec)</b> | <b>APD50<br/>(msec)</b> | <b>RP<br/>(mV)</b> | <b>APA<br/>(mV)</b> |
|---------------------|-------------------------|-------------------------|-------------------------|--------------------|---------------------|
| <b>Control</b>      | 25 ± 4.5                | 5 ± 0.3                 | 2 ± 0.1                 | -76 ± 0.5          | 124 ± 2             |
| <b>Cx43D378stop</b> | 26 ± 3.1                | 6 ± 0.3*                | 3 ± 0.2*                | -78 ± 1            | 127 ± 2             |

\*P < 0.05. n = 9 for control and 10 for Cx43D378stop.
